# Supplementary material for: Reliability of the Athlete Food Choice Questionnaire in Diverse Settings
Source: MDPI journal article supplement (doi:10.3390/ijerph19169981), 2022-08-12
Supplement: s1 [file s1]

## Supplementary

Formula and calculations for estimating the minimum sample size needed to compare Cronbach Alpha scores.

$$\delta = \frac{1 - CA_1}{1 - CA_2}$$

$$n = \left\lceil \frac{2 \left( \frac{k_1}{k_1 - 1} + \frac{k_2}{k_2 - 1} \right) (Z_{\alpha/2} + Z_{\beta})^2}{\ln(\delta)^2} \right\rceil + 2$$

$$\delta = \frac{1 - 0.80}{1 - 0.90}$$

$$\delta = 2.00$$

$$\delta = \frac{1 - 0.65}{1 - 0.80}$$

$$\delta = 1.75$$

$$n = \left\lceil \frac{2 \left( \frac{3}{3-1} + \frac{3}{3-1} \right) (1.960 + 0.841)^2}{\ln(2.00)^2} \right\rceil + 2$$

$$n = 100$$

$$n = \frac{100+152}{2} = 126$$

$$n = \left\lceil \frac{2 \left( \frac{3}{3-1} + \frac{3}{3-1} \right) (1.960 + 0.841)^2}{\ln(1.75)^2} \right\rceil + 2$$

$$n = 152$$
